# Supplementary material
Source: publisher site journal article supplement (https://www.dovepress.com/article/574489)
Supplement: Supplementary file 1 [file 574489_Appendix%201_RSI2.docx]

**Appendix 1: Post-Program Evaluation Survey – Blended-Learning RSI Training Program**

**Demographics and Background**

1. **Gender:** (Male / Female / Other / Prefer not to say)
2. **Professional Grade / Level of Training:** (Resident / Fellow / Specialist / Consultant)
3. **Current Role in Emergency Department:** (Free text)
4. **Country of Medical School Graduation:** (Free text)
5. **Country of Postgraduate Training in Emergency Medicine:** (Free text)
6. **Years of Emergency Department Experience Following Board Certification:** (Free text)
7. **Prior Formal Training in RSI:** (Yes / No)
8. **Type of Prior RSI Training (Select all that apply):** (Simulation-based / Workshop / On-the-job supervised training / Other [please specify])

**Self-Reported Confidence**
9. **Confidence in performing RSI prior to the program** (1 = Very Low Confidence; 5 = Very High Confidence)

**Evaluation of Online Theoretical Component**
*(1 = Strongly Disagree / Very Poor; 5 = Strongly Agree / Excellent)*
10. **Quality of online theoretical instruction**
11. **Online materials covered essential knowledge**
12. **Engagement and interactivity of online learning content**
13. **Accessibility and ease of use of online materials**

**Evaluation of Practical (Simulation) Component**
*(1 = Strongly Disagree / Very Poor; 5 = Strongly Agree / Excellent)*
14. **Quality of hands-on training sessions**
15. **Hands-on training improved my practical RSI skills**
16. **Instructor effectiveness during hands-on sessions**
17. **Realism and clinical applicability of hands-on scenarios**

**Evaluation of Small-Group Learning Format**
*(1 = Strongly Disagree; 5 = Strongly Agree)*
18. **Overall effectiveness of small-group learning sessions**
19. **Small-group sessions offered ample participation opportunities**
20. **Comfort level in sharing thoughts during small-group sessions**

**Overall Program Evaluation**
21. **Overall satisfaction with the program** (1 = Very Dissatisfied; 5 = Very Satisfied)
22. **The program met my educational expectations** (1 = Strongly Disagree; 5 = Strongly Agree)
23. **Confidence in performing RSI following program completion** (1 = Very Low; 5 = Very High)
24. **Likelihood to recommend this program to colleagues** (1 = Definitely Not; 5 = Definitely Yes)

**Qualitative Feedback (Free-Text Responses)**
25. What was the **most beneficial aspect** of the small-group learning format?
26. What **improvements would you suggest** for the small-group learning sessions?
27. What has been the **most significant change** in your RSI skills or confidence following this program?
28. Please provide any **additional comments or suggestions** for the program as a whole.
29. What **improvements would you suggest** for the online learning component?
30. What were the **most beneficial aspects** of the hands-on training?
31. What **improvements would you suggest** for the hands-on training component?
